# Supplementary material
Source: publisher site journal article supplement (http://www.degruyter.com/publication/journal_key/GEO/downloadAsset/GEO_CFP%20Advances%20in%20Mediterranean%20Geosciences.pdf)
Supplement: Supplementary file 1 [file GEO_CFP%20Advances%20in%20Mediterranean%20Geosciences.pdf]

## Call for papers – Special Issue on ADVANCES IN MEDITERRANEAN GEOSCIENCES

### GUEST EDITORS

---

Dist. Prof. Zhihua Zhang, Dr. Nabil Khelifi, Prof. M. James C. Crabbe, Prof. Ahmed Radwan,  
Prof. Mourad Bezzeghoud

### DESCRIPTION

---

The Circum-Mediterranean regions are located at the crossroad of global environmental patterns. There is a convergence between various maritime conditions and different continental air masses from adjacent extensive lands marked by extreme differences in topographical features. On the spatial scale, various climate and environmental parameters vary considerably across Circum-Mediterranean regions. Over the temporal scale, there have been significant climate and environmental changes occurring over the past thousands of years. Most of Circum-Mediterranean regions are characterized by a hot and arid climate, so further warming would cause serious water scarcity, heat waves, and other natural disasters across this region, leading to an unbearable future for human beings and ecosystems.

In order to make suitable mitigation and adaptation measures, it is critically important to reveal mechanisms of historical climate and environmental changes in Circum-Mediterranean regions across a wide range of timescales, and make better predictions and impact assessments for future changes. Unfortunately, at present, the Circum-Mediterranean regions have not been deeply investigated and assessed, compared with other regions of the world such as Europe and North America. This special issue will give new insights into patterns, mechanisms, and impacts of past and future climate/environmental changes in the Circum-Mediterranean region. Topics include but are not limited to:

- Data Mining Techniques in Applied Geoscience with special focus on Circum-Mediterranean regions
- Climate and Environmental Changes in Circum-Mediterranean regions: Mechanism, Simulation and Prediction
- Vulnerable Terrestrial and Marine Ecosystems in Circum-Mediterranean regions
- Impact Assessments and Mitigation Measures of Natural Disasters in Circum-Mediterranean regions
- Strategies and Roadmap for Achieving the UN Sustainable Development Goals in Circum-Mediterranean regions

The known **Mediterranean Geosciences Union (MedGU)** provides unique opportunities for geoscientists to undertake interdisciplinary collaborative geoscience research in circum-Mediterranean regions. More than 1500 researchers will give their presentations in [2023 MedGU Annual Meeting](#). In addition to regular submissions, the special issue will welcome submissions from the best 1% presentations selected by the 2023 MedGU Annual Meeting.

### HOW TO SUBMIT

---

All manuscripts (research and review papers) should be submitted online at <https://www.editorialmanager.com/opengeo/>. The submitted manuscripts should meet the requirements provided in [Instruction for Authors](#). Authors are encouraged to use the Open Geosciences [Manuscript Template](#).

The online paper processing system provides a track dedicated to this Special Issue – please make sure that the option “**MedGU-23**” is selected when you submit your manuscript. *Open Geosciences* ensures that all submitted papers will be considered by the editor and will go through a peer-review process as any other paper. Accepted articles will be indexed, abstracted and published. The deadline for submission is **May 31, 2024**.

In case of questions or further detailed information please contact Managing Editor  
– Dr. Jan Barabach ([jan.barabach@degruyter.com](mailto:jan.barabach@degruyter.com)).

- Authors publishing in *Open Geosciences* enjoy the following benefits:
- IMPACT FACTOR (2022) – 2.0
- no submission charges
- fast, comprehensive and transparent peer-review
- free language assistance for authors from non-English speaking regions
- immediate publication upon completing the publishing process
- comprehensive abstracting and indexing – JCR and SCIE, SCOPUS
- extensive promotion and worldwide distribution of each published article
